# Supplementary material for: Design of Peptoid-peptide Macrocycles to Inhibit the β-catenin TCF Interaction in Prostate Cancer
Source: PubMed Central journal article supplement (PMC6199279; doi:10.1038/s41467-018-06845-3), 2018-10-23
Supplement: 41467_2018_6845_MOESM1_ESM.pdf [file 41467_2018_6845_MOESM1_ESM.pdf]

## **Supplementary Information**

Design of Peptoid-peptide Macrocycles to Inhibit the  $\beta$ -catenin TCF Interaction in Prostate Cancer

Schneider and Craven et al.

## Supplementary Figures

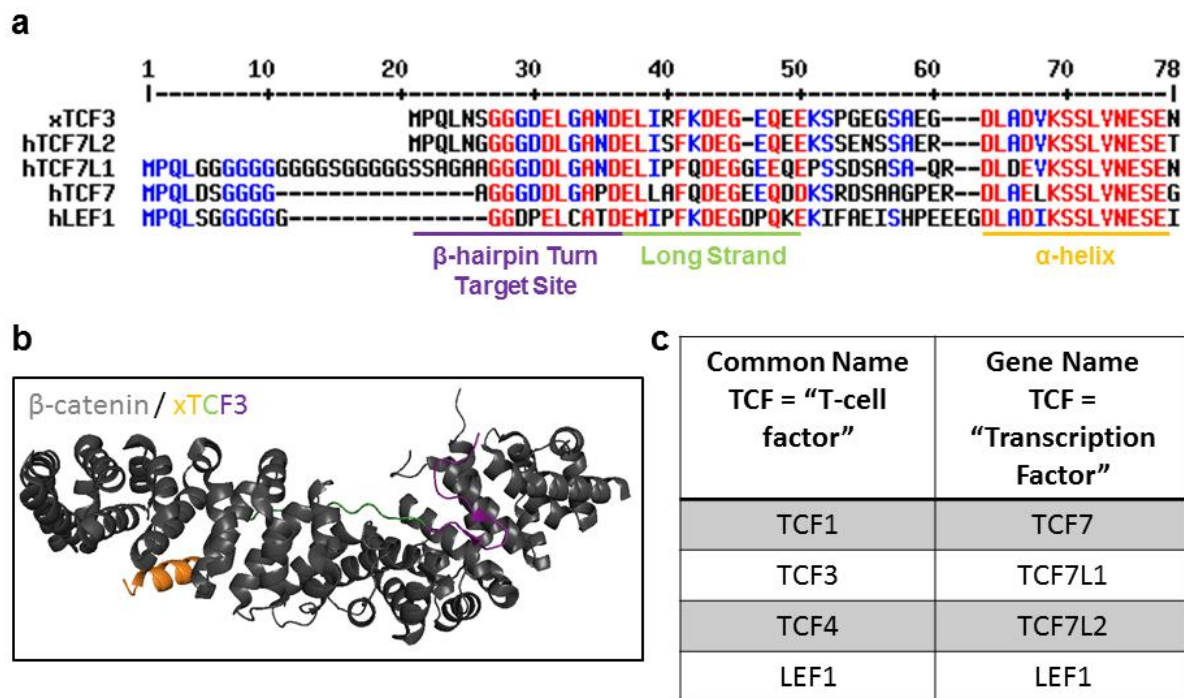

**Supplementary Figure 1.** Catenin binding domains of TCF/LEF family members. **(a)** Alignment of the amino acid sequence for the catenin binding domains for human TCF/LEF family members with xenopus TCF3. **(b)** Crystal structure of xTCF3 bound to  $\beta$ -catenin, xTCF3 colors denote each region as marked in panel a. **(c)** Table for comparing common TCF/LEF T-Cell Factor names to Transcription Factor gene names.

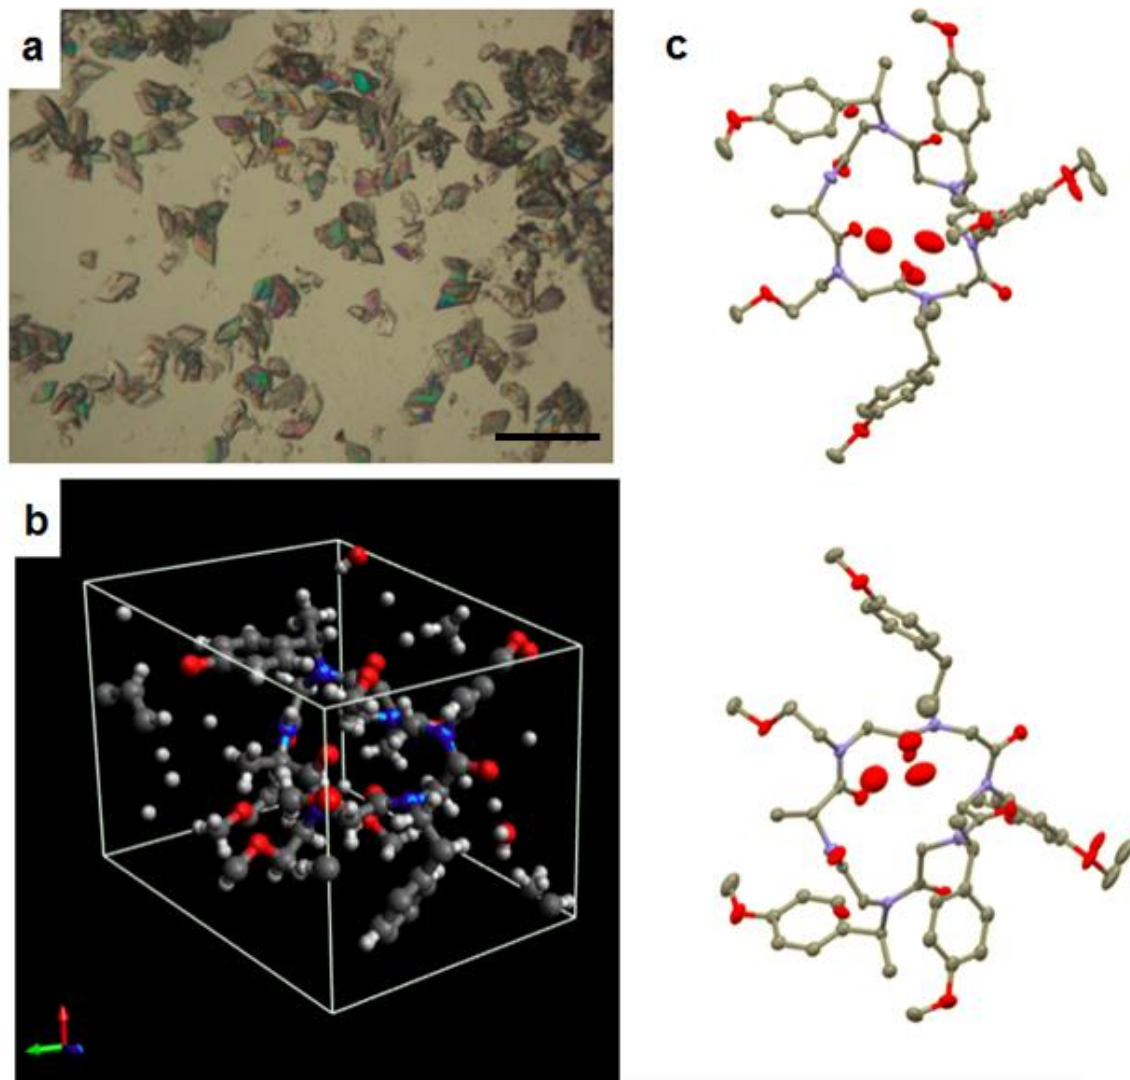

**Supplementary Figure 2.** Crystallization and X-ray structure determination of compound **1**. **(a)** Crystals of **1** obtained after ~7 days upon slow evaporation of 1 mL of a 50:50 solution of water and methanol and ~5 mg of **1**. Scale bar represents 400  $\mu\text{m}$ . **(b)** Unit cell depiction of the X-ray structure of **1**. **(c)** Ellipsoid representation of the heavy atoms in **1**. **Note:** Unit cell contains 2 water molecules and 1 methanol molecule from crystallization solvent.

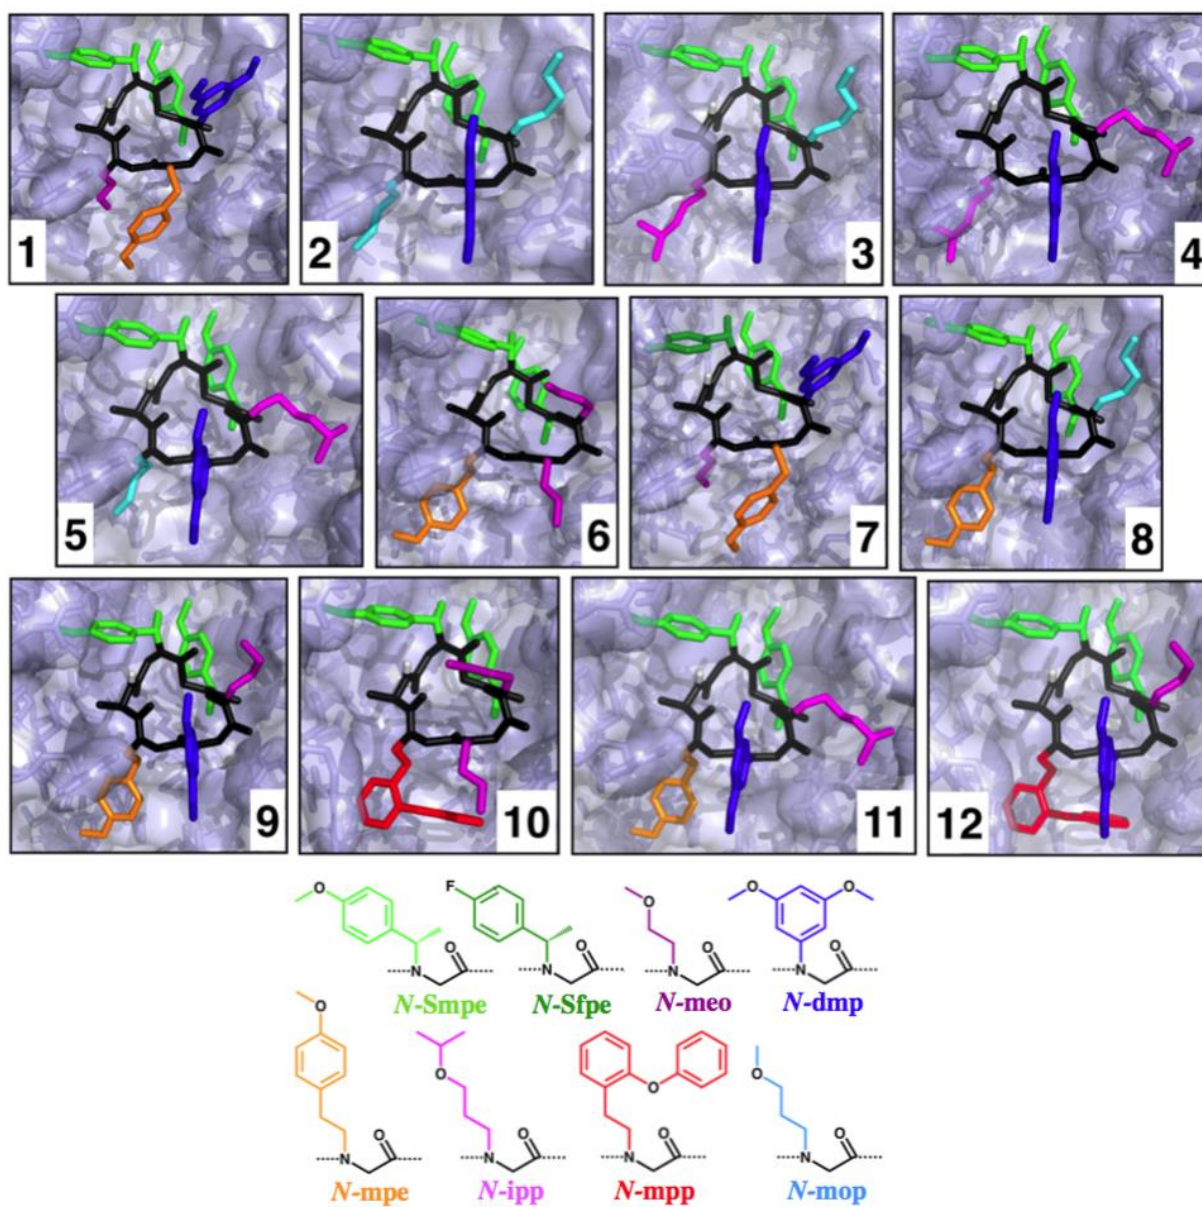

**Supplementary Figure 3.** Modeling of macrocycles on the surface of  $\beta$ -catenin. Depictions of the lowest energy docked conformations of **Compounds 1-12** found in Figure 2 in the N-terminal TCF binding region of  $\beta$ -catenin (in light blue).

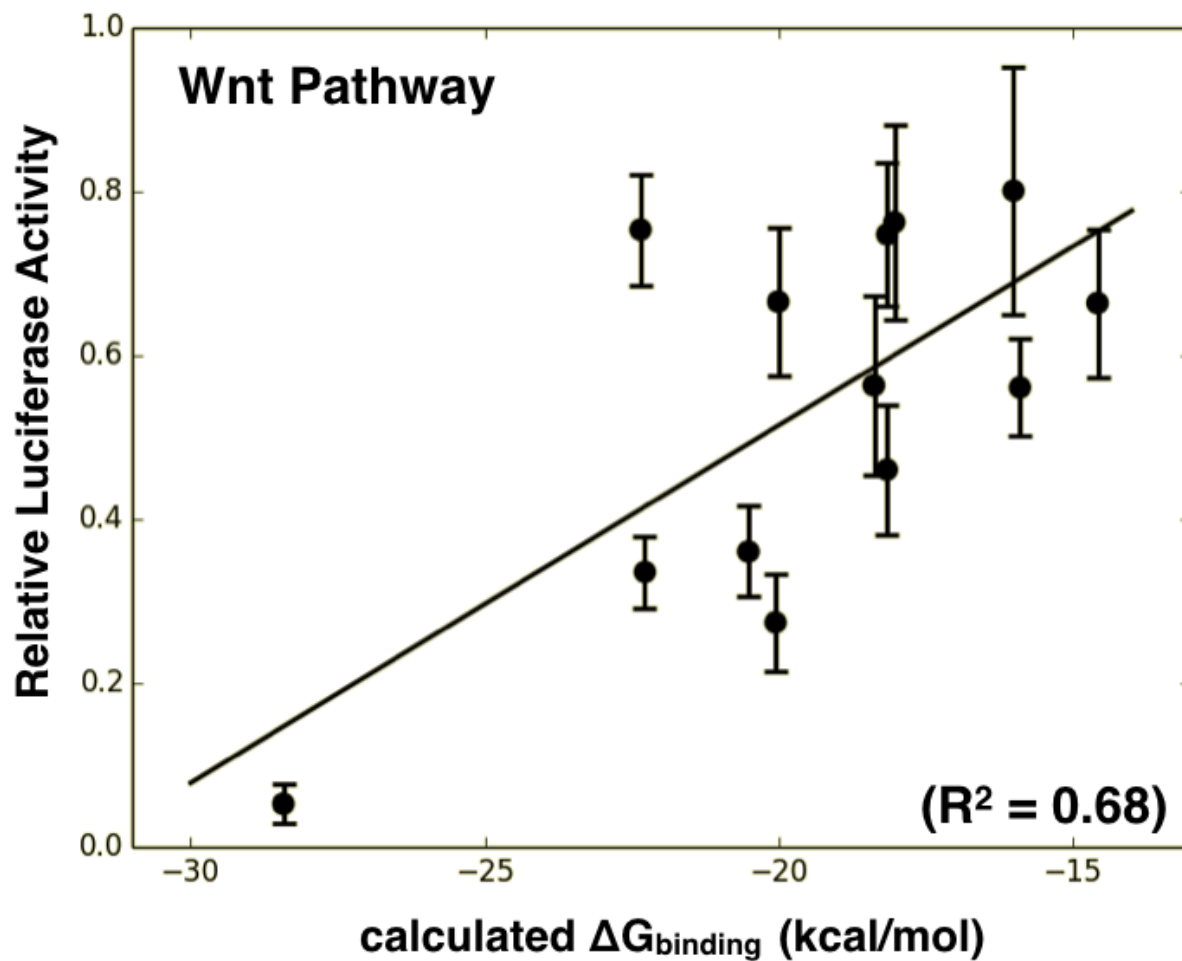

**Supplementary Figure 4.** Wnt inhibition vs. the calculated binding energies. Relationship of the calculated  $\Delta G_{\text{binding}}$  for **Compounds 1-13** (values can be found in Supplementary Table 1) versus the observed relative luciferase activity at 10  $\mu\text{M}$  macrocycle concentrations in the Wnt signaling reporter assay. Data are presented as mean and SD ( $n=3$ ).

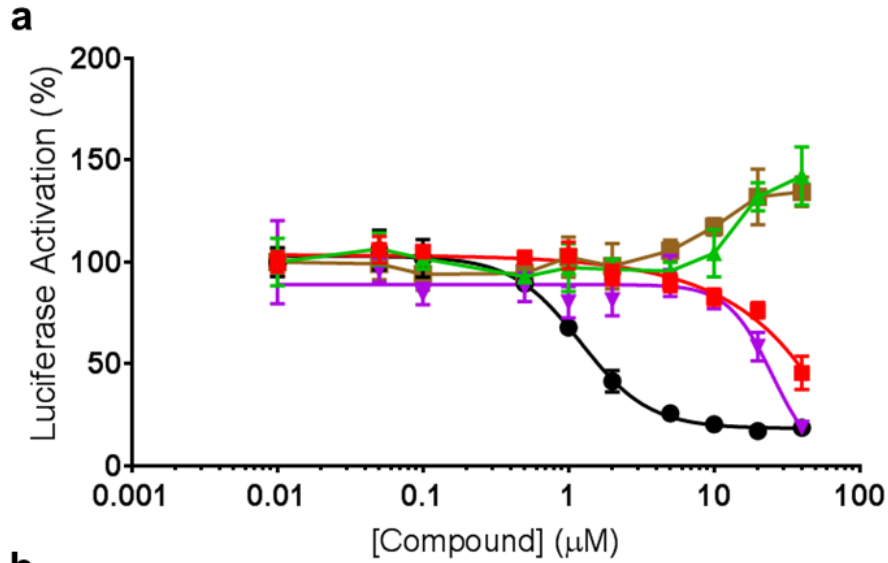

**b**

| Compound  | Target               | IC <sub>50</sub> ( $\mu\text{M}$ ) | Supplemental Reference |
|-----------|----------------------|------------------------------------|------------------------|
| ● iCRT3   | $\beta$ -catenin/TCF | 1.21 +/- 0.07                      | 1                      |
| ■ LF3     | $\beta$ -catenin/TCF | >40                                | 2                      |
| ▼ PRI-724 | $\beta$ -catenin/CBP | 25.1 +/- 9.6                       | 3                      |
| ▲ IWR-1   | Tankyrase            | N/A                                | 4                      |
| ■ IWP-2   | Porcupine            | N/A                                | 4                      |

**Supplementary Figure 5.** Control Wnt inhibitors activity in Wnt luciferase assay. **(a)** Dose response curves of 5 different previously developed Wnt inhibitors in the Wnt luciferase assay. **(b)** Color code, target, IC<sub>50</sub>, and supplemental references for each Wnt inhibitor<sup>1-4</sup>. Data are presented as mean and SD (n=4) of a representative of two independent experiments.

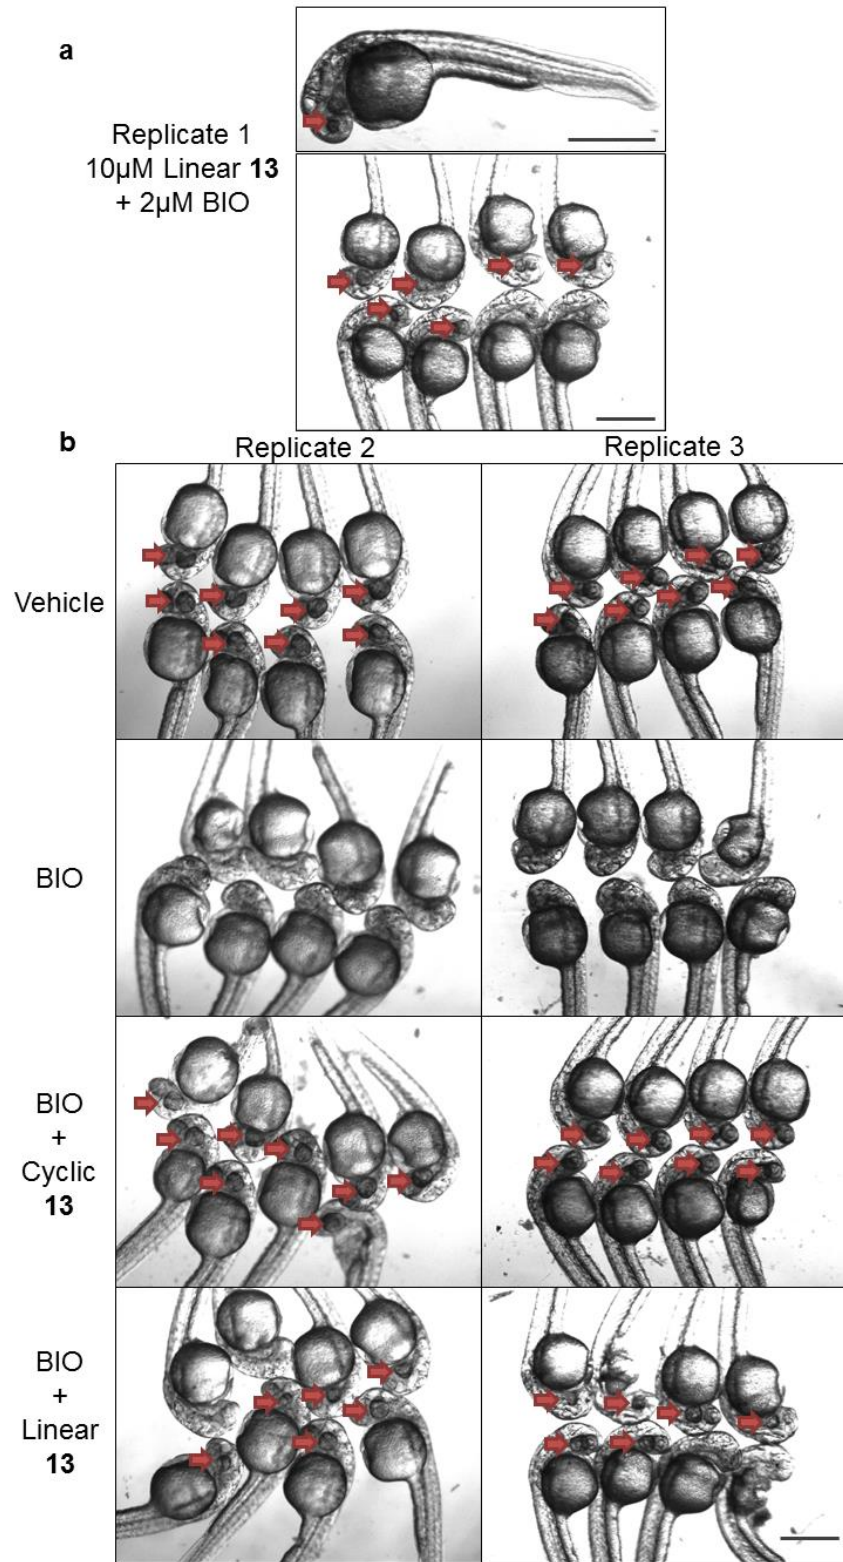

**Supplementary Figure 6.** Zebrafish experiment replicates. **(a)** Zebrafish treated with 10  $\mu$ M Linear 13 and 2 $\mu$ M BIO corresponding to Fig. 6. **(b)** Replicates for zebrafish experiments. Red arrows point to developing eye structures. Scale bars represent 500  $\mu$ m.

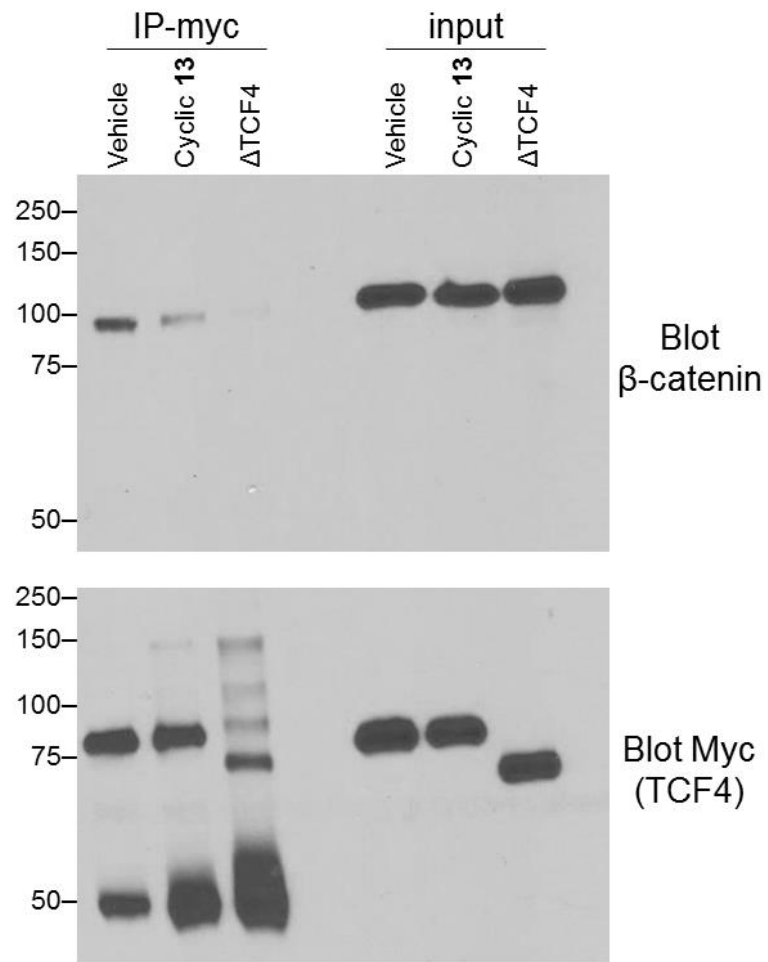

**Supplemental Figure 7.** Full western blots from immunoprecipitation experiment.



## Supplementary Tables

**Supplementary Table 1.** Unit cell parameters for crystals of **1** used for X-ray determination.

|                     |                                        |                                       |                                       |
|---------------------|----------------------------------------|---------------------------------------|---------------------------------------|
| <b>Space Group</b>  | <b>P1</b>                              |                                       |                                       |
| <b>Cell Lengths</b> | <b>a: 11.431(2)</b>                    | <b>b: 11.631(2)</b>                   | <b>c: 12.105(3)</b>                   |
| <b>Cell Angles</b>  | <b><math>\alpha</math>: 114.596(3)</b> | <b><math>\beta</math>: 111.002(3)</b> | <b><math>\gamma</math>: 96.789(4)</b> |
| <b>Cell Volume</b>  | <b>1296.62</b>                         |                                       |                                       |
| <b>Z, Z'</b>        | <b>Z: 1 Z':0</b>                       |                                       |                                       |
| <b>R-Factor (%)</b> | <b>6.25</b>                            |                                       |                                       |

**Supplementary Table 2.** Modeling metrics for compounds 1-13.

|             | calculated<br>$\Delta G_{\text{binding}}$<br>(kcal/mol) | shape<br>complimentarity | $\Delta$ SASA interface<br>( $\text{\AA}^2$ ) | $\Delta$ SASA polar ( $\text{\AA}^2$ ) | $\Delta$ SASA<br>hydrophobic<br>( $\text{\AA}^2$ ) |
|-------------|---------------------------------------------------------|--------------------------|-----------------------------------------------|----------------------------------------|----------------------------------------------------|
| Compound 1  | -15.8982                                                | 0.439813                 | 1151.5                                        | 414.743                                | 736.754                                            |
| Compound 2  | -16.0074                                                | 0.444125                 | 1112.42                                       | 332.554                                | 779.864                                            |
| Compound 3  | -18.035                                                 | 0.52024                  | 1178.67                                       | 452.441                                | 726.233                                            |
| Compound 4  | -22.3507                                                | 0.526814                 | 1298.32                                       | 320.875                                | 977.448                                            |
| Compound 5  | -18.1555                                                | 0.468027                 | 1192.2                                        | 301.082                                | 891.119                                            |
| Compound 6  | -20.0088                                                | 0.446744                 | 1235.37                                       | 390.083                                | 845.292                                            |
| Compound 7  | -14.5798                                                | 0.396349                 | 1089.45                                       | 387.565                                | 701.885                                            |
| Compound 8  | -18.3853                                                | 0.391991                 | 1257.71                                       | 398.555                                | 859.151                                            |
| Compound 9  | -18.1607                                                | 0.412817                 | 1220.19                                       | 387.653                                | 832.537                                            |
| Compound 10 | -20.519                                                 | 0.519971                 | 1288.65                                       | 452.346                                | 836.301                                            |
| Compound 11 | -22.2764                                                | 0.413352                 | 1338.35                                       | 337.868                                | 1000.48                                            |
| Compound 12 | -20.0559                                                | 0.507976                 | 1301.96                                       | 452.674                                | 849.286                                            |
| Compound 13 | -28.4243                                                | 0.539725                 | 1466.47                                       | 522.41                                 | 944.061                                            |

Interface metrics for the lowest energy docked conformations of **Compounds 1-13** presented in Supplementary Fig. 3. Calculated  $\Delta G_{\text{binding}}$  was found using the InterfaceAnalyzer Protocol in the Rosetta Molecular Design Suite using the 'beta' score function<sup>5,6</sup>. The shape complementarity was calculated using an implementation of the CCP4 algorithm within Rosetta. 'SASA' : solvent-accessible surface area<sup>7</sup>.

**Supplementary Table 3.** Dynamic light scattering of  $\beta$ -catenin.

**$\beta$ -catenin + Vehicle**

| Replicate 1 | Radius (nm) | %Pd  | %Mass | Replicate 2 | Radius (nm) | %Pd | %Mass | Replicate 3 | Radius (nm) | %Pd  | %Mass |
|-------------|-------------|------|-------|-------------|-------------|-----|-------|-------------|-------------|------|-------|
| Peak 1      | 5.0         | 5.4  | 98.6  | Peak 1      | 5.0         | 7.1 | 99.3  | Peak 1      | 5.1         | 9.6  | 100.0 |
| Peak 2      | 18.2        | 11.9 | 0.5   | Peak 2      | 31.7        | 7.9 | 0.1   | Peak 2      | 61.0        | 11.4 | 0.0   |
| Peak 3      | 136.3       | 0.0  | 0.9   | Peak 3      | 139.6       | 7.4 | 0.6   |             |             |      |       |

**$\beta$ -catenin + Compound 13**

| Replicate 1 | Radius (nm) | %Pd  | %Mass | Replicate 2 | Radius (nm) | %Pd  | %Mass | Replicate 3 | Radius (nm) | %Pd  | %Mass |
|-------------|-------------|------|-------|-------------|-------------|------|-------|-------------|-------------|------|-------|
| Peak 1      | 5.9         | 9.6  | 30.6  | Peak 1      | 6.0         | 8.5  | 40.1  | Peak 1      | 6.2         | 3.2  | 40.9  |
| Peak 2      | 222.4       | 5.9  | 49.6  | Peak 2      | 25.9        | 0.0  | 0.4   | Peak 2      | 71.9        | 11.2 | 0.3   |
| Peak 3      | 661.5       | 11.2 | 19.8  | Peak 3      | 237.4       | 11.4 | 59.5  | Peak 3      | 286.6       | 8.3  | 58.8  |

**$\beta$ -catenin +  $\alpha$ -cyclodextrin**

| Replicate 1 | Radius (nm) | %Pd | %Mass | Replicate 2 | Radius (nm) | %Pd  | %Mass | Replicate 3 | Radius (nm) | %Pd  | %Mass |
|-------------|-------------|-----|-------|-------------|-------------|------|-------|-------------|-------------|------|-------|
| Peak 1      | 5.1         | 9.0 | 82.2  | Peak 1      | 4.8         | 5.2  | 100.0 | Peak 1      | 4.9         | 3.2  | 100.0 |
| Peak 2      | 51.3        | 7.3 | 0.1   | Peak 2      | 38.4        | 11.0 | 0.0   | Peak 2      | 57.4        | 11.6 | 0.0   |
| Peak 3      | 224.5       | 7.4 | 3.2   |             |             |      |       |             |             |      |       |
| Peak 4      | 5877.6      | 8.3 | 14.5  |             |             |      |       |             |             |      |       |

Raw data from replicates of DLS experiments. %Pd = %Polydispersity. Peak 1 is  $\beta$ -catenin with or without compound **13** or  $\alpha$ -cyclodextrin. Peaks 2-4 are considered to be  $\beta$ -catenin aggregates due to large radii values.

**Supplementary Table 4.** Key for chemical abbreviations.

| <b>Abbreviation</b> | <b>Chemical Name</b>                                                      |
|---------------------|---------------------------------------------------------------------------|
| DMF                 | dimethylformamide                                                         |
| DIC                 | diisopropylcarbodiimide                                                   |
| DCM                 | dichloromethane                                                           |
| HFIP                | hexafluoroisopropanol                                                     |
| ACN                 | acetonitrile                                                              |
| PyBop               | benzotriazol-1-yl-<br>oxytripyrrolidinophosphonium<br>hexafluorophosphate |
| DIEA                | N,N-Diisopropylethylamine                                                 |

**Supplementary table 5.** Primers used for RT-qPCR.

| <b>Gene</b>  | <b>Forward Primer</b>      | <b>Reverse Primer</b>      |
|--------------|----------------------------|----------------------------|
| <b>RPL19</b> | CACAAGCTGAAGGCAGACAA       | GCGTGCTTCCTTGGTCTTAG       |
| <b>AR</b>    | TACCAGCTCACCAAGCTCCT       | GAAGTATGCAGCTCTCTCG        |
| <b>AR-V7</b> | CCATCTTGTCGTCTTCGGAAATGTTA | TTTGAATGAGGCAAGTCAGCCTTTCT |
| <b>Myc</b>   | TCGGAAGGACTATCCTGCTG       | GTGTGTTGCGCCTCTTGACATT     |
| <b>CycD1</b> | CCGTCCATGCGGAAGATC         | GAAGACCTCCTCCTCGCACT       |
| <b>E-Cad</b> | TGAAGGTGACAGAGCCTCTGGAT    | TGGGTGAATTCGGGCTTGTT       |
| <b>PSA</b>   | CCAAGTTCATGCTGTGTGCT       | GCACACCATTACAGACAAGTGG     |
| <b>FKBP5</b> | CGCAGGATATACGCCAACAT       | CTTGCCCATTGCTTTATTGG       |

All primers are shown starting at the 5' end.

## Supplementary References

1. Gonsalves, F.C. et al. An RNAi-based chemical genetic screen identifies three small-molecule inhibitors of the Wnt/wingless signaling pathway. *Proc Natl Acad Sci U S A* **108**, 5954-63 (2011).
2. Fang, L. et al. A Small-Molecule Antagonist of the beta-Catenin/TCF4 Interaction Blocks the Self-Renewal of Cancer Stem Cells and Suppresses Tumorigenesis. *Cancer Res* **76**, 891-901 (2016).
3. Emami, K.H. et al. A small molecule inhibitor of beta-catenin/CREB-binding protein transcription [corrected]. *Proc Natl Acad Sci U S A* **101**, 12682-7 (2004).
4. Chen, B. et al. Small molecule-mediated disruption of Wnt-dependent signaling in tissue regeneration and cancer. *Nat Chem Biol* **5**, 100-7 (2009).
5. Stranges, P.B. & Kuhlman, B. A comparison of successful and failed protein interface designs highlights the challenges of designing buried hydrogen bonds. *Protein Sci* **22**, 74-82 (2013).
6. Park, H. et al. Simultaneous Optimization of Biomolecular Energy Functions on Features from Small Molecules and Macromolecules. *J Chem Theory Comput* **12**, 6201-6212 (2016).
7. Lawrence, M.C. & Colman, P.M. Shape complementarity at protein/protein interfaces. *J Mol Biol* **234**, 946-50 (1993).
